# Supplementary material for: Hydrogen bond-assisted solid-state formation of a salt-bridged calix[5]arene pseudo-dimer
Source: Royal Society of Chemistry journal article supplement (doi:10.1039/c3ce41667d), 2013-10-22
Supplement: c3ce41667d.pdf [file c3ce41667d.pdf]

## Hydrogen bond-assisted solid-state formation of a salt-bridged calix[5]arene pseudo-dimer

Giovanna Brancatelli,<sup>a</sup> Sebastiano Pappalardo,<sup>b</sup> Giuseppe Gattuso,<sup>c</sup> Anna Notti,<sup>c</sup>  
Ilenia Pisagatti,<sup>c</sup> Melchiorre F. Parisi\*<sup>c</sup> and Silvano Geremia,\*<sup>a</sup>

<sup>a</sup> *Centro di Eccellenza in Biocristallografia, Dipartimento di Scienze Chimiche e  
Farmaceutiche, Università di Trieste, via L. Giorgieri 1, 34127 Trieste, Italy.*

<sup>b</sup> *Dipartimento di Scienze Chimiche, Università di Catania, viale A. Doria 6, 95125 Catania,  
Italy.*

<sup>c</sup> *Dipartimento di Scienze Chimiche, Università di Messina, viale F. Stagno d'Alcontres 31,  
98166 Messina, Italy.*

## Electronic Supplementary Information

**Table S1** Crystal data and structure refinement for (*n*-BuNH<sub>3</sub><sup>+</sup>C1a<sup>-</sup>·1a·H<sub>2</sub>O·CH<sub>3</sub>CN).

| 2 ( <i>n</i> -BuNH <sub>3</sub> <sup>+</sup> C1a <sup>-</sup> ·1a·H <sub>2</sub> O·CH <sub>3</sub> CN) |                                                                                                                                                                                                               |
|--------------------------------------------------------------------------------------------------------|---------------------------------------------------------------------------------------------------------------------------------------------------------------------------------------------------------------|
| Empirical formula                                                                                      | 2(C <sub>81</sub> H <sub>119</sub> O <sub>7</sub> ), 2(C <sub>4</sub> H <sub>12</sub> N <sub>1</sub> ), 2(C <sub>81</sub> H <sub>120</sub> O <sub>7</sub> ), 2(C <sub>2</sub> H <sub>3</sub> N <sub>1</sub> ) |
| Formula weight                                                                                         | 5051.46                                                                                                                                                                                                       |
| Temperature (K)                                                                                        | 100(2)                                                                                                                                                                                                        |
| Wavelength (Å)                                                                                         | 0.77491                                                                                                                                                                                                       |
| Crystal system                                                                                         | Triclinic                                                                                                                                                                                                     |
| Space group                                                                                            | <i>P</i> $\bar{1}$                                                                                                                                                                                            |
| Unit cell dimensions (Å, °)                                                                            | a = 21.54(2), $\alpha$ = 90.92(4)<br>b = 25.71(2), $\beta$ = 88.87(2)<br>c = 31.95(1), $\gamma$ = 74.53(2)                                                                                                    |
| Volume (Å <sup>3</sup> )                                                                               | 17045(19)                                                                                                                                                                                                     |
| <i>Z</i>                                                                                               | 2                                                                                                                                                                                                             |
| $\rho_{\text{calcd}}$ (g/cm <sup>3</sup> )                                                             | 0.984                                                                                                                                                                                                         |
| $\mu$ (mm <sup>-1</sup> )                                                                              | 0.049                                                                                                                                                                                                         |
| Reflections collected                                                                                  | 39242                                                                                                                                                                                                         |
| Data / restraints / parameters                                                                         | 38444 / 102 / 3422                                                                                                                                                                                            |
| Goof                                                                                                   | 1.047                                                                                                                                                                                                         |
| Final <i>R</i> indices [ <i>I</i> >2 $\sigma$ ( <i>I</i> )]                                            | <i>R</i> <sub>1</sub> = 0.1276, <i>wR</i> <sub>2</sub> = 0.3302                                                                                                                                               |
| <i>R</i> indices (all data)                                                                            | <i>R</i> <sub>1</sub> = 0.1352, <i>wR</i> <sub>2</sub> = 0.3342                                                                                                                                               |

**Table S2.** H-bond and CH— $\pi$  interactions detected in the crystal structure of pseudo-dimers **I** and **II** ( $n\text{-BuNH}_3^+\text{C1a}^- \cdot \mathbf{1a} \cdot \text{H}\text{C}\text{H}_3\text{CN}$ ) [ $\text{\AA}$ ,  $^\circ$ ].

| <b>D–H<math>\cdots</math>A</b>                                      | <b><i>d</i>(D–H)</b> | <b><i>d</i>(H<math>\cdots</math>A)</b> | <b><i>d</i>(D<math>\cdots</math>A)</b> | <b>(DHA)</b> |
|---------------------------------------------------------------------|----------------------|----------------------------------------|----------------------------------------|--------------|
| <b><i>n</i>-BuNH<math>_3^+</math>C1a<math>^-</math> (<b>I</b>)</b>  |                      |                                        |                                        |              |
| N(1)–H(1b) $\cdots$ O(1l)                                           | 0.89                 | 2.00                                   | 2.767(7)                               | 143.4        |
| N(1)–H(1b) $\cdots$ O(1g)                                           | 0.89                 | 2.12                                   | 2.820(7)                               | 134.8        |
| N(1)–H(1a) $\cdots$ O(4g)                                           | 0.89                 | 2.01                                   | 2.815(7)                               | 149.4        |
| N(1)–H(1c) $\cdots$ O(5g)                                           | 0.89                 | 2.00                                   | 2.857(7)                               | 162.2        |
| C(2)–H(2b) $\cdots$ Cg(B) <sup>a</sup>                              | 0.97                 | 2.98                                   | 3.850(7)                               | 149.3        |
| C(2)–H(2a) $\cdots$ Cg(B') <sup>a</sup>                             | 0.97                 | 2.85                                   | 3.711(7)                               | 148.0        |
| C(3)–H(3b) $\cdots$ Cg(C) <sup>a</sup>                              | 0.97                 | 2.86                                   | 3.800(8)                               | 162.3        |
| C(3)–H(3a) $\cdots$ Cg(C') <sup>a</sup>                             | 0.97                 | 2.97                                   | 3.889(9)                               | 159.2        |
| <b>CH<math>_3</math>CNC1a·H (<b>I</b>)</b>                          |                      |                                        |                                        |              |
| C(8)–H(8a) $\cdots$ Cg(A) <sup>a</sup>                              | 0.96                 | 2.64                                   | 3.561(8)                               | 162.1        |
| C(8)–H(8c) $\cdots$ Cg(C') <sup>a</sup>                             | 0.96                 | 2.65                                   | 3.582(8)                               | 163.3        |
| O(6l)–H(6l) $\cdots$ O(1m)                                          | 0.82                 | 1.67                                   | 2.445(8)                               | 158.0        |
| <b><i>n</i>-BuNH<math>_3^+</math>C1a<math>^-</math> (<b>II</b>)</b> |                      |                                        |                                        |              |
| N(9)–H(9b) $\cdots$ O(11l)                                          | 0.89                 | 2.04                                   | 2.772(7)                               | 138.7        |
| N(9)–H(9b) $\cdots$ O(11g)                                          | 0.89                 | 2.04                                   | 2.791(7)                               | 140.7        |
| N(9)–H(9c) $\cdots$ O(13g)                                          | 0.89                 | 1.90                                   | 2.783(6)                               | 172.9        |
| N(9)–H(9a) $\cdots$ O(14g)                                          | 0.89                 | 2.13                                   | 2.828(7)                               | 134.5        |
| C(10)–H(10b) $\cdots$ Cg(B) <sup>a</sup>                            | 0.97                 | 2.70                                   | 3.636(7)                               | 161.8        |
| C(10)–H(10a) $\cdots$ Cg(B') <sup>a</sup>                           | 0.97                 | 2.95                                   | 3.702(7)                               | 135.6        |
| C(11)–H(11b) $\cdots$ Cg(C) <sup>a</sup>                            | 0.97                 | 3.20                                   | 4.161(7)                               | 170.9        |
| C(11)–H(11a) $\cdots$ Cg(C') <sup>a</sup>                           | 0.97                 | 2.83                                   | 3.690(8)                               | 147.9        |
| <b>CH<math>_3</math>CNC1a·H (<b>II</b>)</b>                         |                      |                                        |                                        |              |
| C(16)–H(16a) $\cdots$ Cg(A) <sup>a</sup>                            | 0.96                 | 2.63                                   | 3.547(7)                               | 160.4        |
| C(16)–H(16c) $\cdots$ Cg(C') <sup>a</sup>                           | 0.96                 | 2.59                                   | 3.529(8)                               | 167.5        |
| O(16l)–H(16l) $\cdots$ O(11m)                                       | 0.82                 | 1.77                                   | 2.462(7)                               | 141.4        |

<sup>a</sup>C<sub>g</sub> (A), (B), (B'), (C), (C'): gravity centres of the A, B, B', C and C' aryl rings, respectively.

**Table S3.** Comparison of the relevant conformational parameters of the two calix[5]arene units present in the crystal structure of pseudo-dimers **I** and **II** ( $n\text{-BuNH}_3^+\text{C1a}^- \cdot \mathbf{1a} \cdot \text{H}\text{C}\text{H}_3\text{CN}$ ).

| <b>Pseudo-dimer</b> | $\theta_A(^\circ)^a$            | $\theta_B(^\circ)^a$ | $\theta_{B'}(^\circ)^a$ | $\theta_C(^\circ)^a$ | $\theta_{C'}(^\circ)^a$ |          |
|---------------------|---------------------------------|----------------------|-------------------------|----------------------|-------------------------|----------|
| <b>(I)</b>          | $n\text{-BuNH}_3^+\text{C1a}^-$ | 130.1(2)             | 105.4(2)                | 99.4(1)              | 118.3(2)                | 120.6(1) |
|                     | CH $_3$ CNC1a·H                 | 89.8(2)              | 126.1(2)                | 142.9(1)             | 124.9(1)                | 82.4(1)  |
| <b>(II)</b>         | $n\text{-BuNH}_3^+\text{C1a}^-$ | 129.9(1)             | 96.1(1)                 | 130.5(1)             | 115.9(2)                | 104.9(1) |
|                     | CH $_3$ CNC1a·H                 | 86.5(2)              | 132.1(2)                | 150.9(1)             | 123.4(1)                | 80.6(2)  |

<sup>a</sup>Dihedral angles calculated between the least-square mean planes of rings A, B, B', C and C' and the macrocycle reference plane defined by the five bridging methylene carbon atoms.

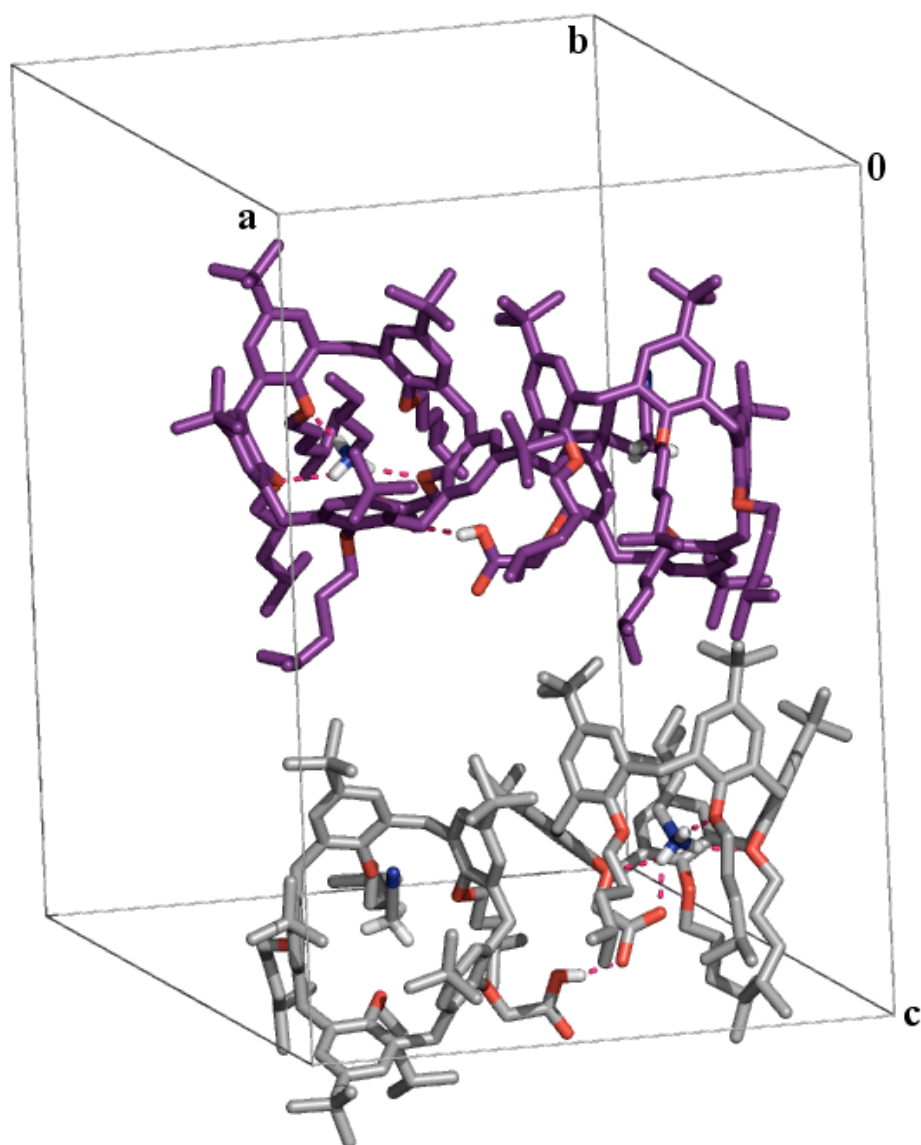

**Fig. S1** The symmetric unit of the supramolecular aggregates ( $n\text{-BuNH}_3^+\text{C1a}^- \cdot \mathbf{1a} \cdot \text{H}\text{OCH}_3\text{CN}$ ). The two pseudo-dimers **I** and **II** are depicted in grey and violet, respectively.

*General Experimental.* Calix[5]arene **1a**·H was prepared according to a literature procedure.<sup>1</sup> *n*-Butylamine and CD<sub>2</sub>Cl<sub>2</sub> were freshly distilled over CaH<sub>2</sub> prior to use. <sup>1</sup>H NMR spectra (500 MHz) were recorded at 273±0.1 K in CD<sub>2</sub>Cl<sub>2</sub>. Sample solutions of **1a**·H (1.0 mM) and a 2:1 mixture of **1a**·H and *n*-BuNH<sub>2</sub> (1.0 and 0.5 mM, respectively), used for <sup>1</sup>H NMR and Diffusion-Ordered Spectroscopy (DOSY) analysis, were directly prepared in the NMR tube from CD<sub>2</sub>Cl<sub>2</sub> stock solutions of the calixarene and the amine (10.0 and 100.0 mM, respectively).

*<sup>1</sup>H NMR Studies.*

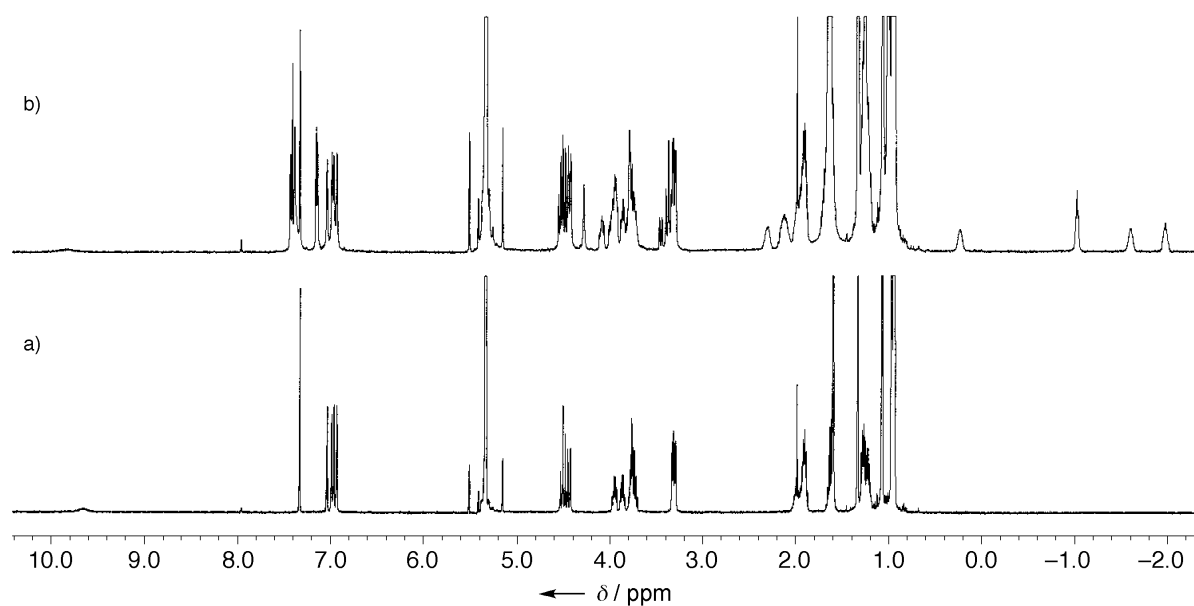

**Fig. S2** <sup>1</sup>H NMR spectra (500 MHz, CD<sub>2</sub>Cl<sub>2</sub>, 273 K) of: a) [**1a**·H] = 1.0 mM and b) [**1a**·H] = 1.0 mM and [*n*-BuNH<sub>2</sub>] = 0.5 mM.

1. C. Capici, G. Gattuso, A. Notti, M. F. Parisi, S. Pappalardo, G. Brancatelli and S. Geremia, *J. Org. Chem.*, 2012, **77**, 9668–9675.

*Diffusion-Ordered Spectroscopy.* DOSY experiments were carried out on a 500 MHz NMR spectrometer equipped with a z-gradient system capable of producing pulse gradients up to 50 gauss·cm<sup>-1</sup>. All spectra were recorded in CD<sub>2</sub>Cl<sub>2</sub> at 273±0.1 K, using a gradient stimulated echo with spin-lock and convection compensation pulse sequence.<sup>2</sup>

Diffusion coefficient (*D*) values, reported in Table S4, were calculated from DOSY experiments carried out on a 2:1 mixture of **1a**·H and *n*-BuNH<sub>2</sub> (1.0 and 0.5 mM, respectively), **1a**·H (1.0 mM) as well as the ‘model’ bis-calix[5]arene **2** (1.0 mM). The latter was chosen as a model compound for a species with a molecular weight roughly similar to the supramolecular pseudo-dimer (*n*-BuNH<sub>3</sub><sup>+</sup>Cl<sup>-</sup>·**1a**·H)·CH<sub>3</sub>CN formed in the solid state.

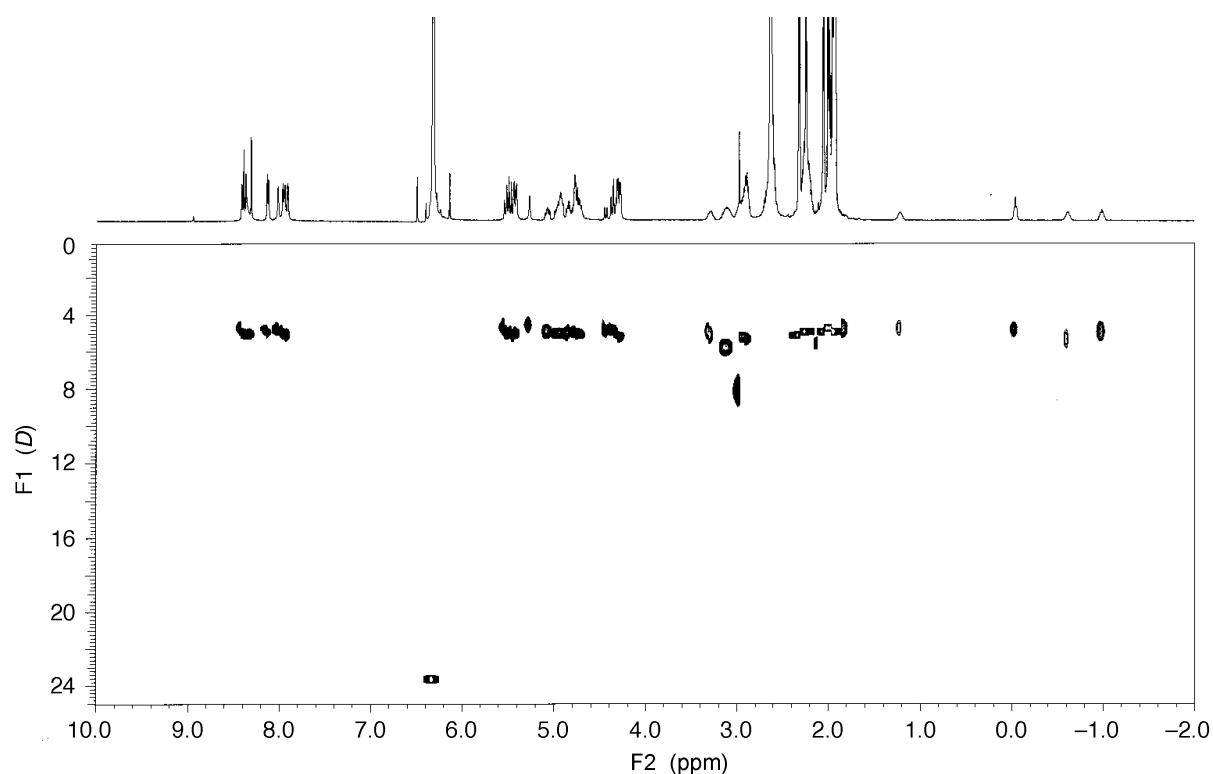

**Fig. S3** DOSY plot (500 MHz, CD<sub>2</sub>Cl<sub>2</sub>, 273 K) of a 2:1 mixture of **1a**·H and *n*-BuNH<sub>2</sub> (1.0 and 0.5 mM, respectively).

2. A. Jerchow and N. Müller, *J. Magn. Reson.*, 1997, **125**, 372–375.

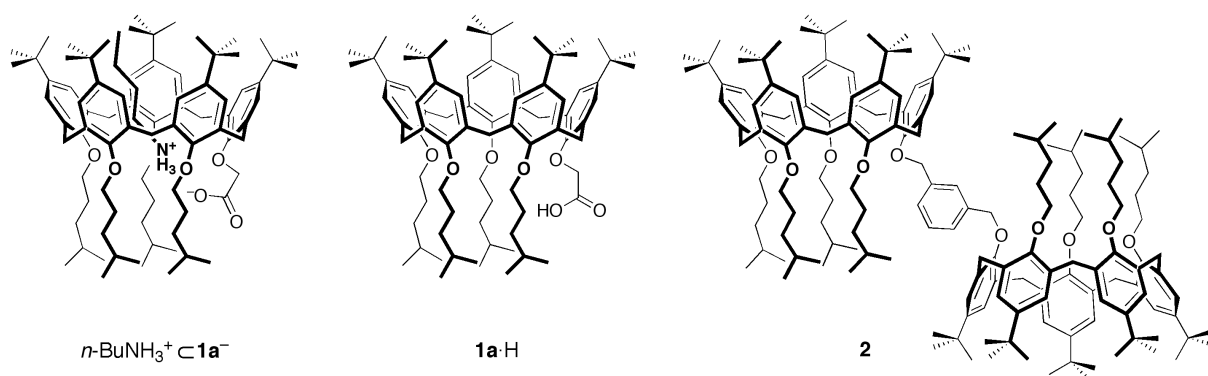

**Table S4.** Diffusion coefficients ( $D$ ) for  $n\text{-BuNH}_3^+ \cdot \mathbf{1a}^-$ ,  $\mathbf{1a} \cdot \text{H}$  and  $\mathbf{2}$ .<sup>a</sup>

| Peak                          | $D$ [ $\times 10^{-10} \cdot \text{m}^2 \cdot \text{s}^{-1}$ ] |                              |                      |
|-------------------------------|----------------------------------------------------------------|------------------------------|----------------------|
|                               | $(\delta$ [ppm])                                               |                              |                      |
|                               | $n\text{-BuNH}_3^+ \cdot \mathbf{1a}^-$                        | $\mathbf{1a} \cdot \text{H}$ | $\mathbf{2}$         |
| $\gamma\text{-CH}_2$          | 4.70±0.30<br>(-1.99)                                           | —                            | —                    |
| $\delta\text{-CH}_3$          | 4.78±0.16<br>(-1.04)                                           | —                            | —                    |
| OCH <sub>2</sub>              | 4.79±0.20<br>(4.07)                                            | 4.90±0.09<br>(3.93)          | 3.88±0.03<br>(3.40)  |
| Ar-H                          | 4.84±0.08<br>(7.13)                                            | 4.93±0.04<br>(6.93)          | 3.75±0.01<br>(7.13)  |
| Ar-H                          | 4.75±0.07<br>(7.14)                                            | 4.94±0.03<br>(6.96)          | 3.76±0.01<br>(7.20)  |
| CHDCl <sub>2</sub> (residual) | 23.85±0.03<br>(5.32)                                           | 23.90±0.03<br>(5.32)         | 23.84±0.02<br>(5.32) |

<sup>a</sup>Diffusion experiments were recorded at 273 K on 1.0 mM CD<sub>2</sub>Cl<sub>2</sub> solutions. In the case of the  $n\text{-BuNH}_3^+ \cdot \mathbf{1a}^-$  complex, a CD<sub>2</sub>Cl<sub>2</sub> solution of  $\mathbf{1a} \cdot \text{H}$  and  $n\text{-BuNH}_2$  (1.0 and 0.5 mM, respectively) solution was used.
